# Supplementary figures and images for: Prediction of Subsequent Contralateral Patellar Dislocation after First-Time Dislocation Based on Patellofemoral Morphologies
Source: MDPI journal article supplement (doi:10.3390/jcm12010180), 2022-12-26

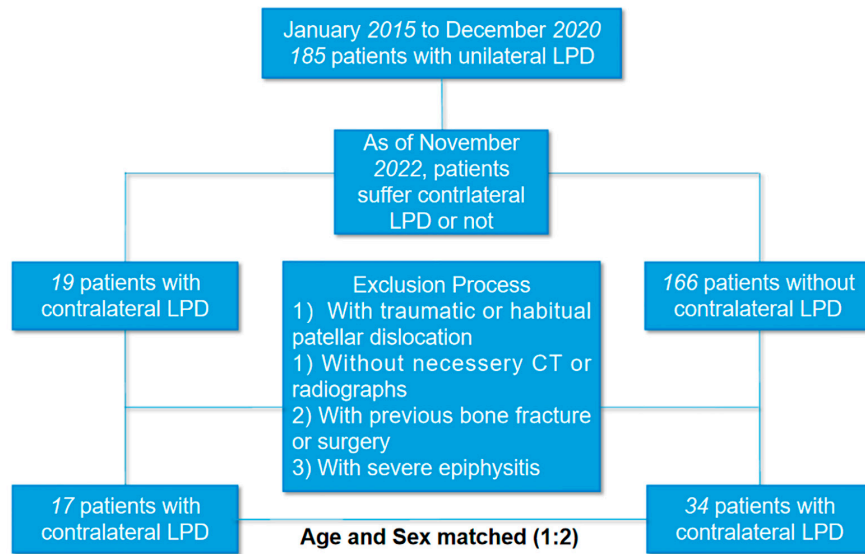

**Figure S1.** Flowchart.

Supplement: s1 [file s1]
